# Supplementary material
Source: publisher figshare collection journal article supplement (https://gsajournals.figshare.com/articles/dataset/_/13238312)
Supplement: Supplementary file 1 [file 1]

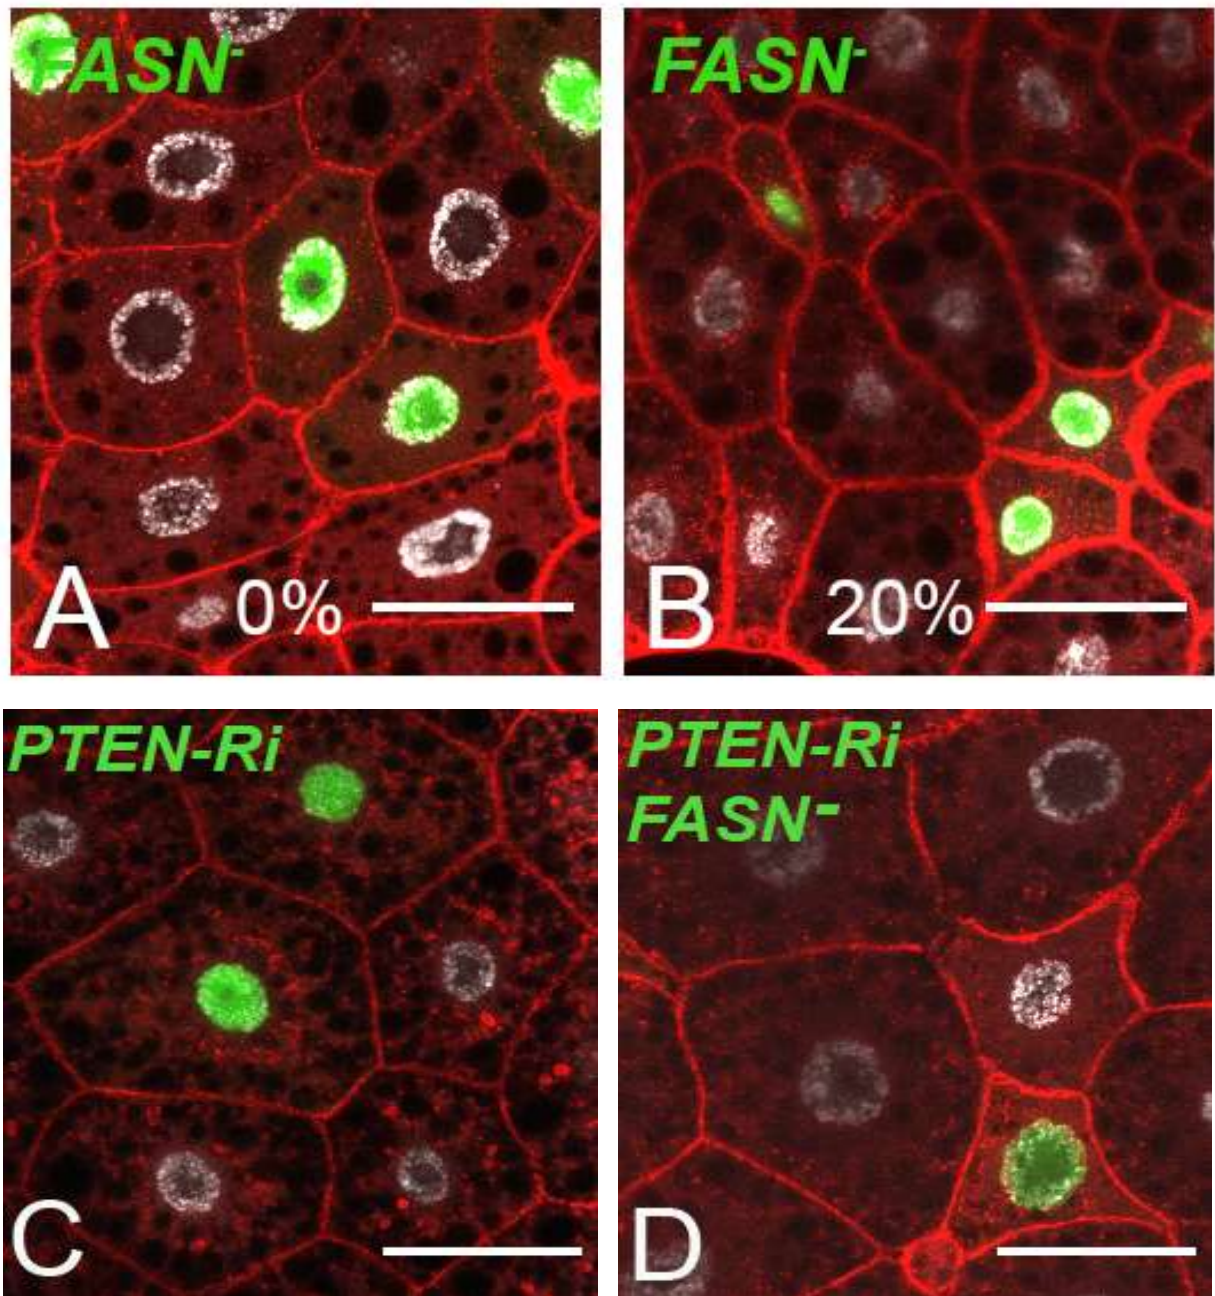

**Figure S5. Clonal size related to Figure 7M.** (A-B) *FASN*<sup>1-2</sup> MARCM clones labeled by GFP (green) in the FB of L3 larvae fed either a standard diet (A) or a 20%-SSD (B). (C-D) MARCM clones in the FB of L3 larvae fed a standard diet, labeled by GFP (green) express a PTEN-RNAi (PTEN-Ri) either alone (C) or in combination with the *FASN*<sup>1-2</sup> mutation (D). Nuclei are labeled with DAPI (silver) and membranes by phalloidin (red). Scale bars: 50µm.
