# Supplementary material
Source: publisher figshare collection journal article supplement (https://gsajournals.figshare.com/articles/dataset/_/13238312)
Supplement: Supplementary file 2 [file 1]

**A**

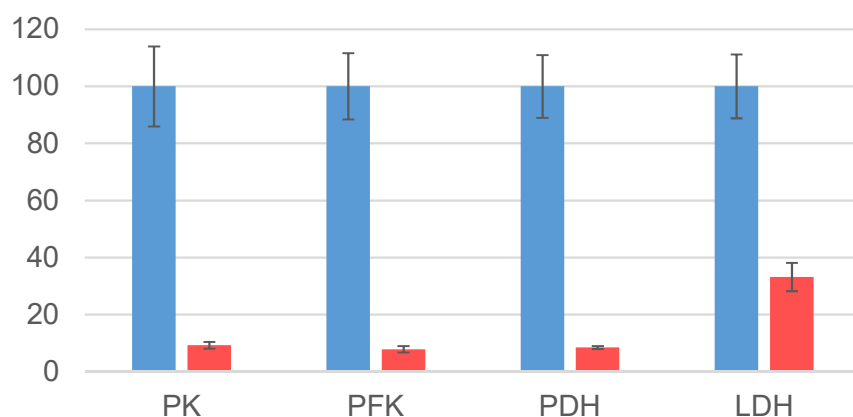

**B**

PFK1: 5'-CCAGTGCCTTCGATCGTATT-3'      5'-GTTGCCGTCCAGAGAGATG-3'  
PK: 5'-GAACGTAACCATCTACGATGAGG-3'      5'-CATGTGCTCCAGTTGGGTAT-3'  
LDH: 5'-CGTCTCCACCTCCGTTT-3'      5'-TCACACCGTTGGCATTGA-3'  
PDH: 5'-TGATCCCATCACCTCCTTCA-3'      5'-CCTTCAGATCGATGGCCTTAAC-3'

**Figure S1. Knockdown efficacy of the RNAi to the glycolytic enzymes.** (A) mRNA expression in control larvae (blue bars, +/- standard error) was adjusted to 100. mRNA levels after RNAi knockdown (red bars, +/- standard error) was calculated as a percentage of corresponding expression in control larvae. (B) Oligonucleotides used in RT-Q-PCR for each glycolytic enzyme.
