# Supplementary material
Source: publisher figshare collection journal article supplement (https://gsajournals.figshare.com/articles/dataset/_/13238312)
Supplement: Supplementary file 3 [file 1]

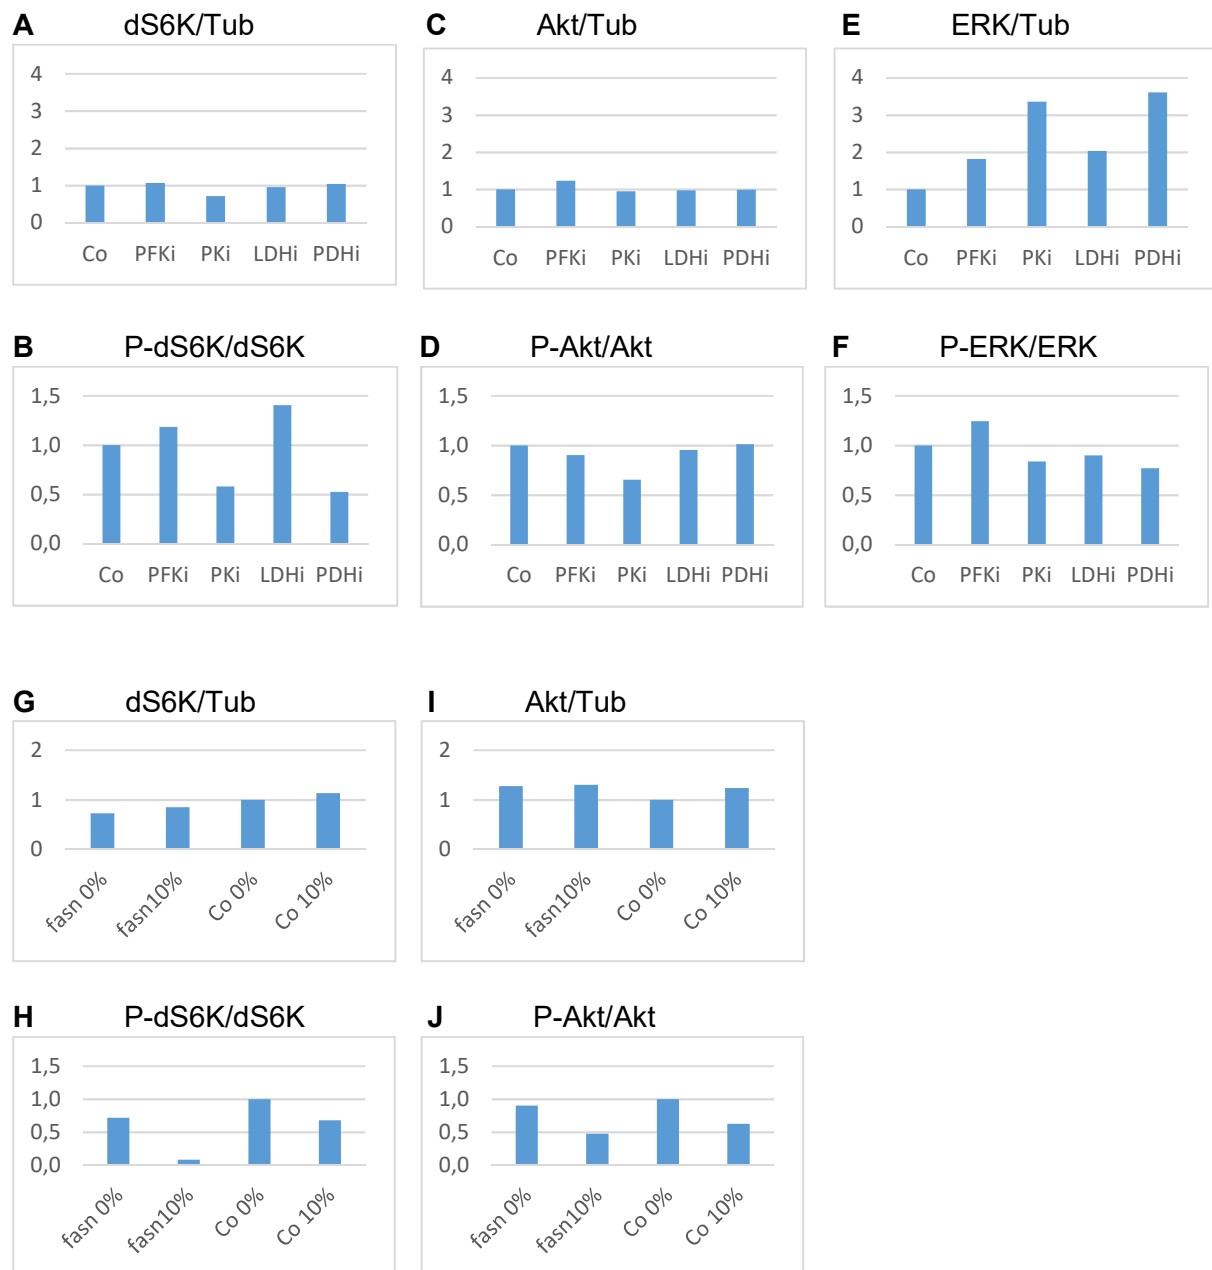

**Figure S3. Western-blot quantification:** (A-F) Quantification of two independent experiments corresponding to figure 4C. (G-J) Quantification corresponding to figure 6C. Optical densities were calculated using ImageJ. Total protein amounts of dS6K (A, G), Akt (C, I) and ERK (E) were calculated as the optical density value for the specific protein normalized to the corresponding tubulin value. Phosphorylation rates of dS6K (B, H), Akt (D, J) and ERK (F) were calculated as the optical density value for the phosphorylated form normalized to the corresponding total protein kinase value. For each panel, ratios are normalized to the control value, which is adjusted to 1.
