# Supplementary material
Source: publisher figshare collection journal article supplement (https://gsajournals.figshare.com/articles/dataset/_/13238312)
Supplement: Supplementary file 4 [file 1]

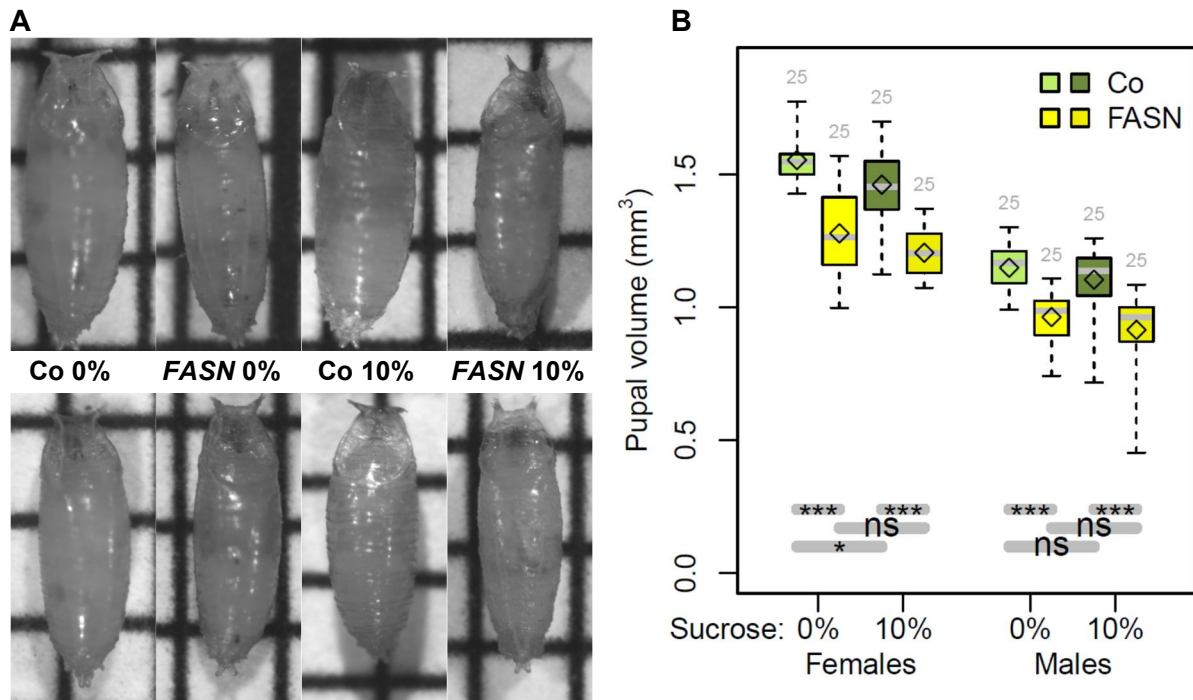

**Figure S4: Pupal size.** (A) 0-1 day old pupae either control (Co) or *FASN*<sup>1-2</sup> mutant (*FASN*) fed a beySD supplemented (10%) or not (0%) with sucrose since L2/L3 transition; females are at the top and males at the bottom. (B) Comparison of mean pupal volumes. Considering that a pupae is roughly an ellipsoid, its volume can be calculated from the equation  $Vol = \frac{4}{3}\pi * L * l$ , where  $L$  and  $l$  represent the length and the width, respectively. Note that sucrose supplementation tend to reduce the pupal volume, although not significantly.
