# Supplementary material
Source: publisher figshare collection journal article supplement (https://gsajournals.figshare.com/articles/dataset/_/13238312)
Supplement: Supplementary file 5 [file 1]

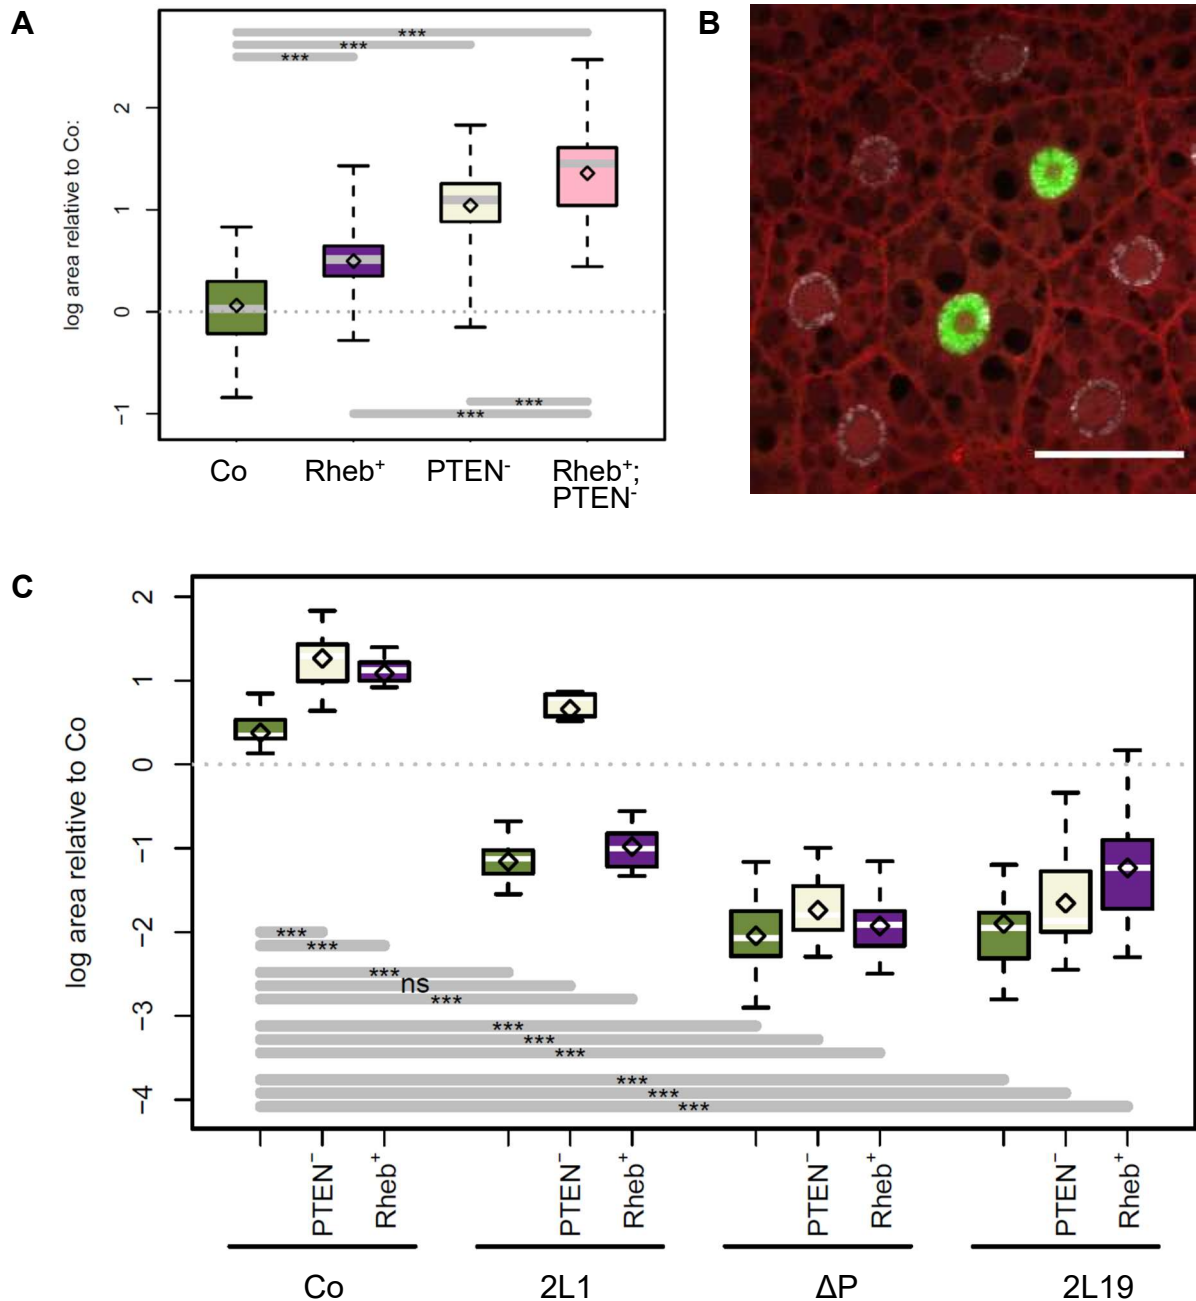

**Figure S2. Statistical analyses for the size of clones analyzed in figure 1. (A)** Control (Co), Rheb overexpressing (Rheb<sup>+</sup>), *PTEN* mutant (PTEN<sup>-</sup>) and combined (PTEN<sup>-</sup>; Rheb<sup>+</sup>) clones were analyzed in a wild type background. **(B)** MARCM control clones labelled by GFP (green) generated in a *Minute* background; these clones are slightly bigger than the surrounding cells, likely, because the latter are heterozygous for the *Minute* mutation, whereas control clones are homozygous wild type for *Minute*. **(C)** Co, Rheb<sup>+</sup> and PTEN<sup>-</sup> clones combined with the *Tor*<sup>2L1</sup>(2L1), *Tor*<sup>ΔP</sup>(ΔP) and *Tor*<sup>2L19</sup>(2L19) mutations were analyzed in a *Minute* background. Note that the size ratio (clonal/surrounding cells) of *Tor*<sup>2L1</sup>,PTEN<sup>-/-</sup> clones tends to be higher than the control clone ratio, although not significantly.
